# Supplementary material for: Metadynamics supports molecular dynamics simulation-based binding affinities of eucalyptol and beta-cyclodextrin inclusion complexes
Source: Royal Society of Chemistry journal article supplement (doi:10.1039/c7ra09387j), 2017-01-01
Supplement: c7ra09387j1.pdf [file c7ra09387j1.pdf]

## Supplementary Materials

### **Metadynamics supports molecular dynamics simulation-based binding affinities of eucalyptol and beta-cyclodextrins inclusion complexes**

Bodee Nutho<sup>a</sup>, Nadtanet Nunthaboot<sup>\*b</sup>, Peter Wolschann<sup>c,d,e</sup>, Nawee Kungwan<sup>f,g</sup>,

Thanyada Rungrotmongkol<sup>\*c,h,i</sup>

<sup>a</sup>Program in Biotechnology, Faculty of Science, Chulalongkorn University, Bangkok 10330, Thailand

<sup>b</sup>Department of Chemistry and Center of Excellence for Innovation in Chemistry, Faculty of Science, Mahasarakham University, Mahasarakham 44150, Thailand

<sup>c</sup>Structural and Computational Biology Research Group, Department of Biochemistry, Faculty of Science, Chulalongkorn University, Bangkok 10330, Thailand

<sup>d</sup>Department of Pharmaceutical Technology and Biopharmaceutics, University of Vienna, Vienna 1090, Austria

<sup>e</sup>Institute of Theoretical Chemistry, University of Vienna, Vienna 1090, Austria

<sup>f</sup>Department of Chemistry, Faculty of Science, Chiang Mai University, Chiang Mai 50200, Thailand

<sup>g</sup>Research Center on Chemistry for Development of Health Promoting Products from Northern Resources, Chiang Mai University, Chiang Mai, 50200, Thailand.

<sup>h</sup>Ph.D. Program in Bioinformatics and Computational Biology, Faculty of Science, Chulalongkorn University, Bangkok 10330, Thailand

<sup>i</sup>Molecular Sensory Science Center, Faculty of Science, Chulalongkorn University, Bangkok 10330, Thailand

\*Corresponding authors. Tel: +66 43754246, +66 22185426; Fax: +66 43754246, +66 22185418  
E-mail address: nadtanet@gmail.com, thanyada.r@chula.ac.th

## Figure Caption

**Fig. S1** RMSD plots of all atoms in the inclusion complex for the five eucalyptol/ $\beta$ CDs: (a-b) eucalyptol/ $\beta$ CD, (c-d) eucalyptol/2,6-DM $\beta$ CD, (e-f) eucalyptol/2-HP $\beta$ CD, (g-h) eucalyptol/6-HP $\beta$ CD and (i-j) eucalyptol/2,6-DHP $\beta$ CD obtained from the other two independent simulations.

**Fig. S2** Distances between the centers of mass of eucalyptol and the CD molecules in (a-b) eucalyptol/ $\beta$ CD, (c-d) eucalyptol/2,6-DM $\beta$ CD, (e-f) eucalyptol/2-HP $\beta$ CD, (g-h) eucalyptol/6-HP $\beta$ CD and (i-j) eucalyptol/2,6-DHP $\beta$ CD inclusion complexes obtained from the other two independent simulations.

**Fig. S3** The distributions of (a) the intramolecular hydrogen bond distances,  $O3_{(n)}-O2_{(n+1)}$ , and (b) the distances between the adjacent glycosidic oxygens,  $O4_{(n)}-O4_{(n+1)}$ , of  $\beta$ CDs in ligand bound form.

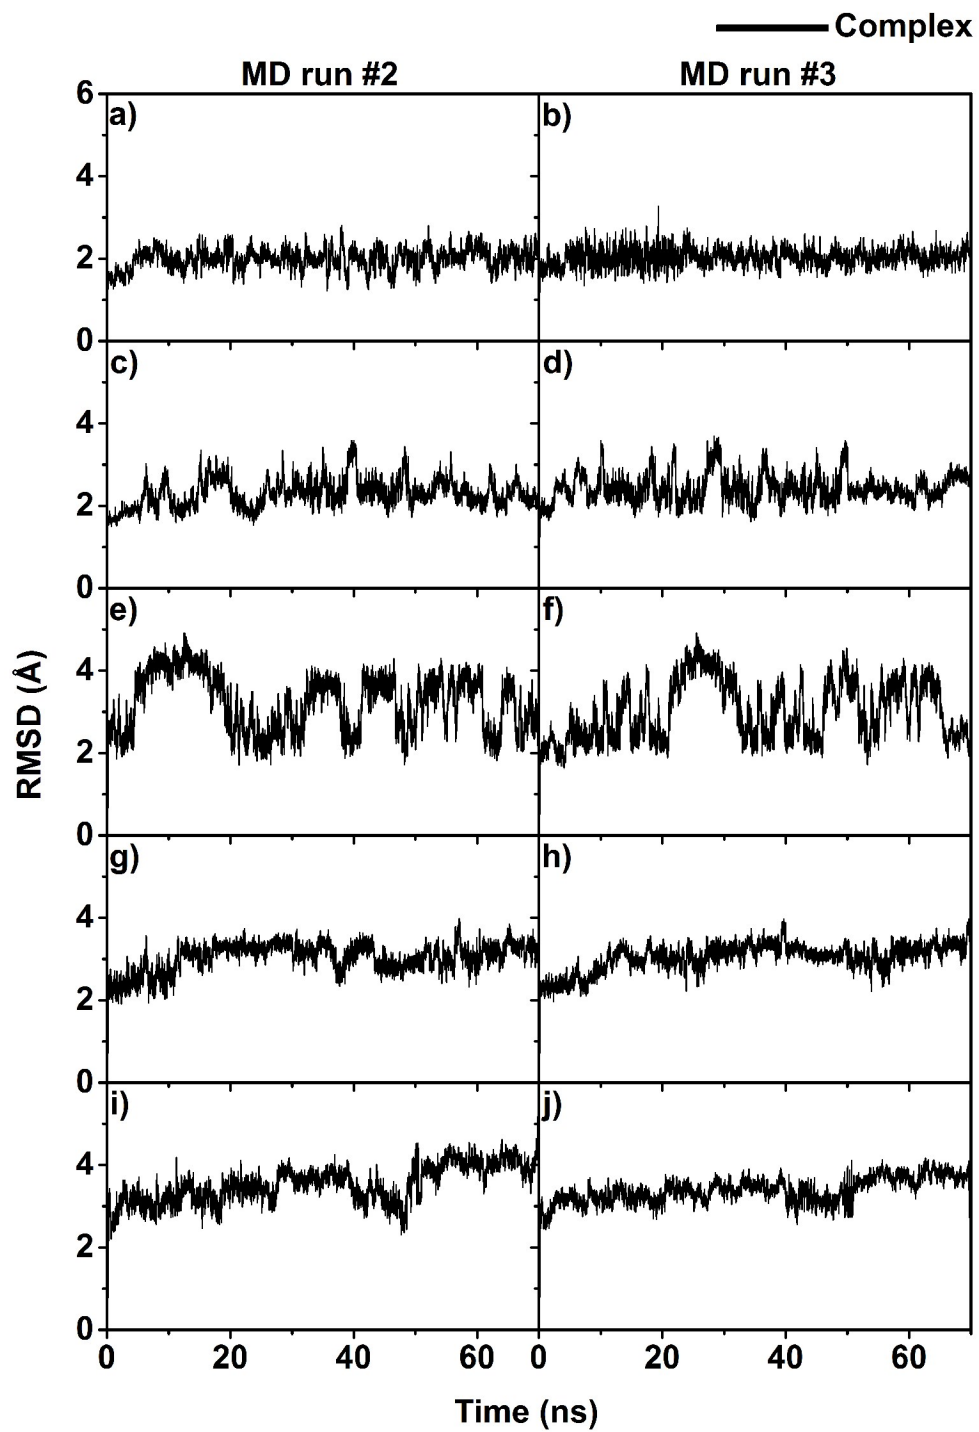

Figure S1

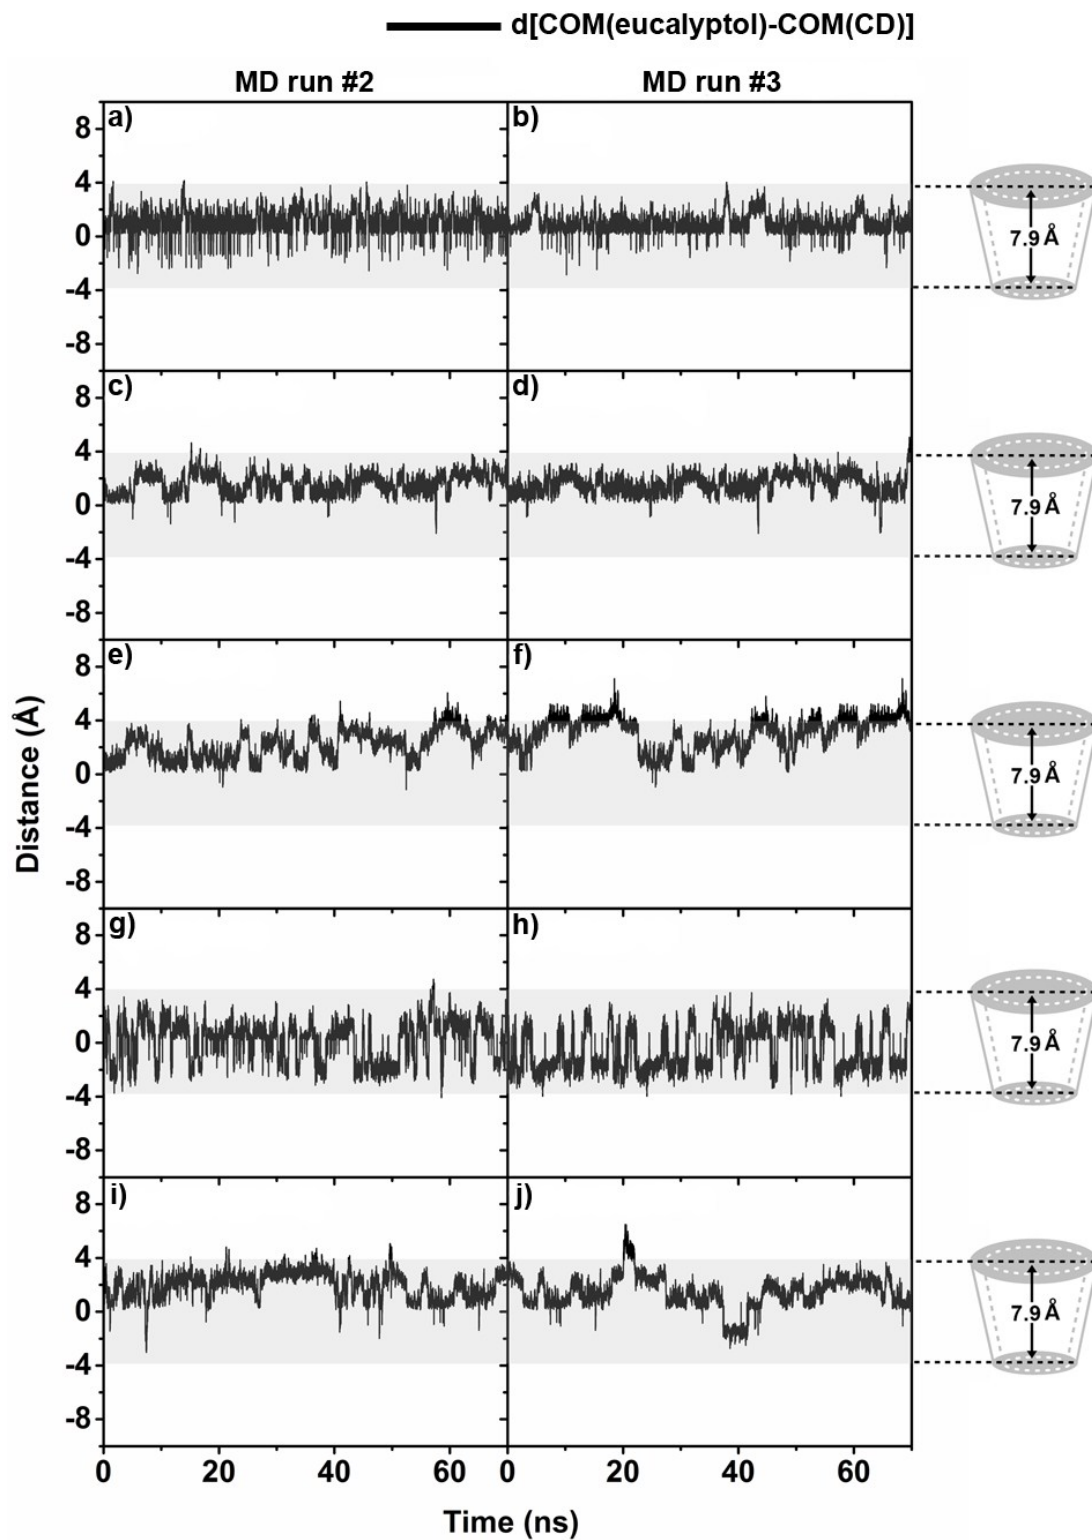

Figure S2

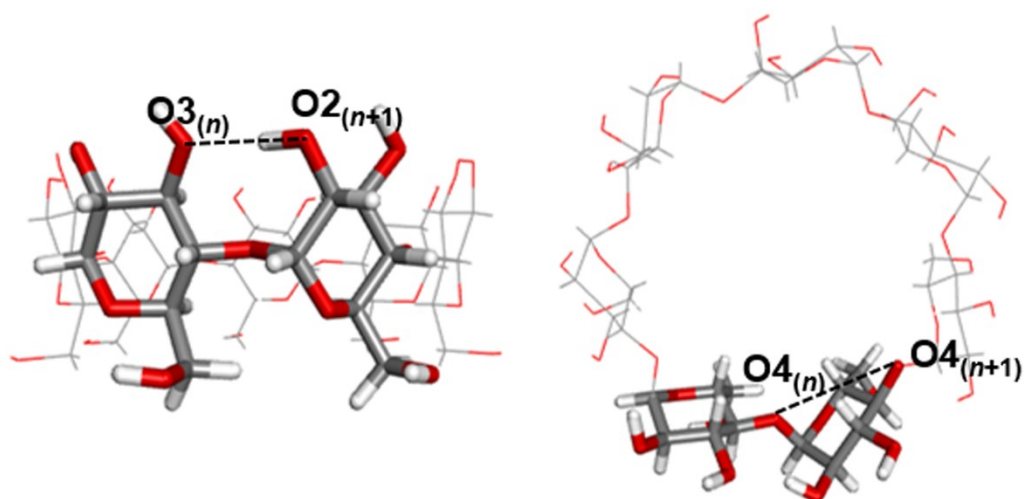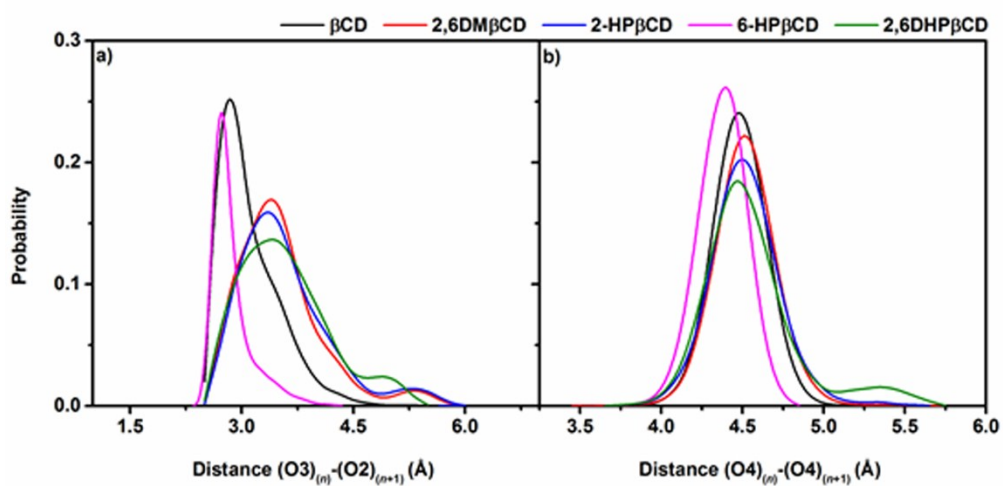

Figure S3
